# Supplementary material
Source: PubMed Central journal article supplement (PMC4768356)

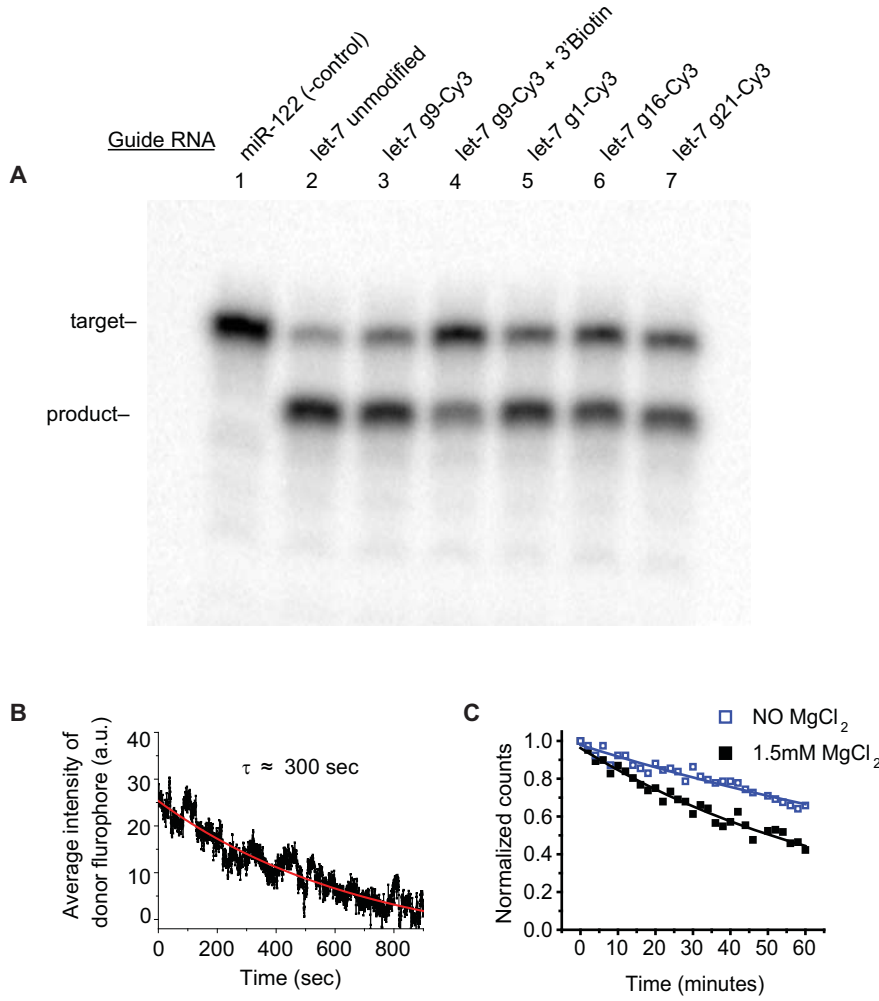

Supplement: NIHMS67271-supplement-Figure_S1.pdf [file NIHMS67271-supplement-Figure_S1.pdf]

**A**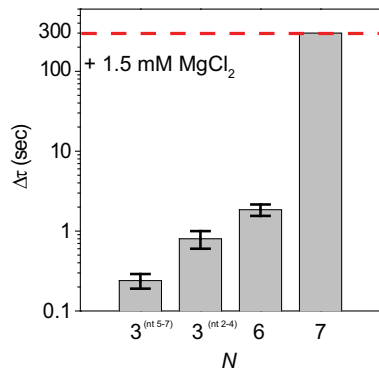**B**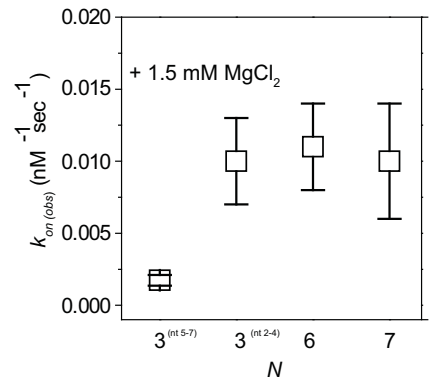**C**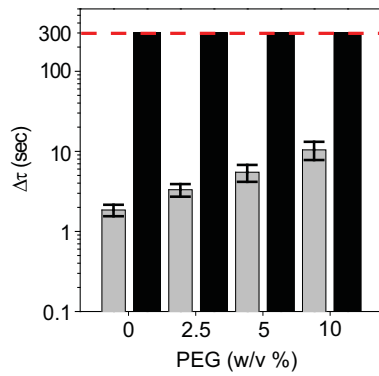

Supplement: NIHMS67271-supplement-Figure_S2.pdf [file NIHMS67271-supplement-Figure_S2.pdf]

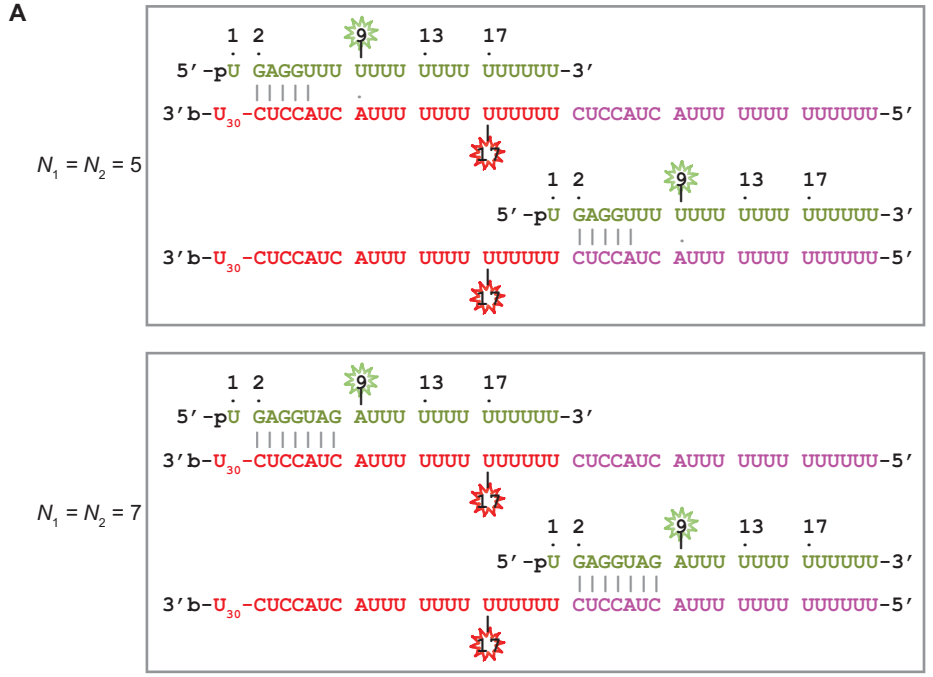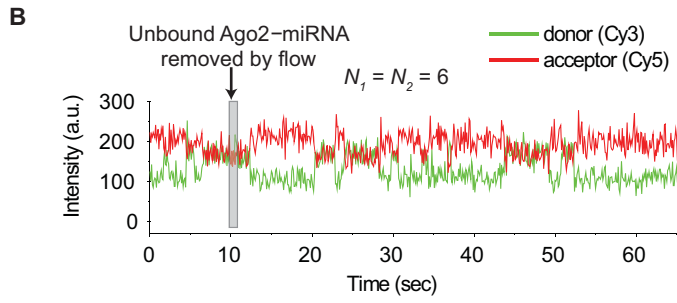

Chandradoss et al

Figure S3

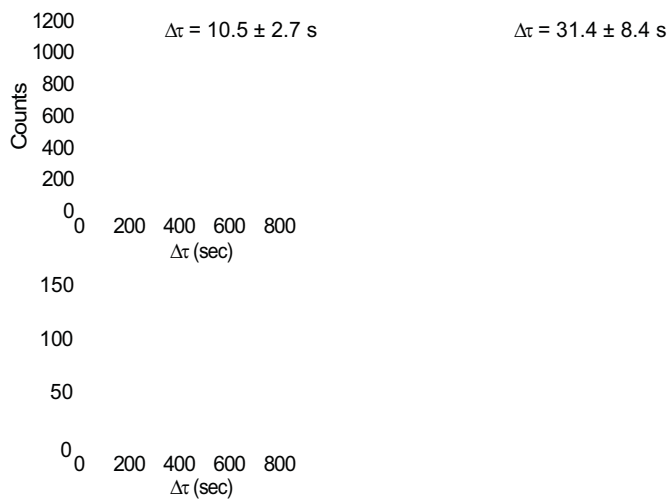

Supplement: NIHMS67271-supplement-Figure_S3.pdf [file NIHMS67271-supplement-Figure_S3.pdf]

**A**

$N_1 = N_2 = 8$

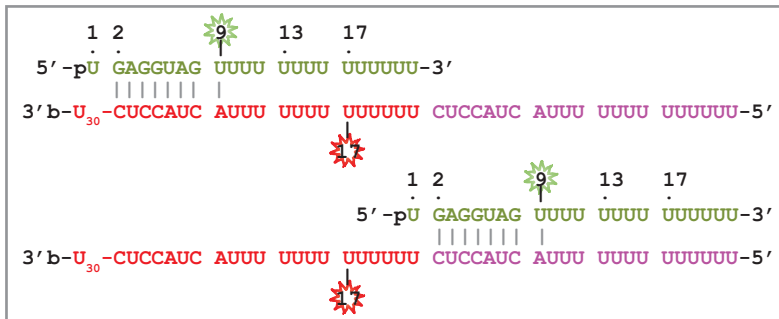

$N_1 = N_2 = 7+10$

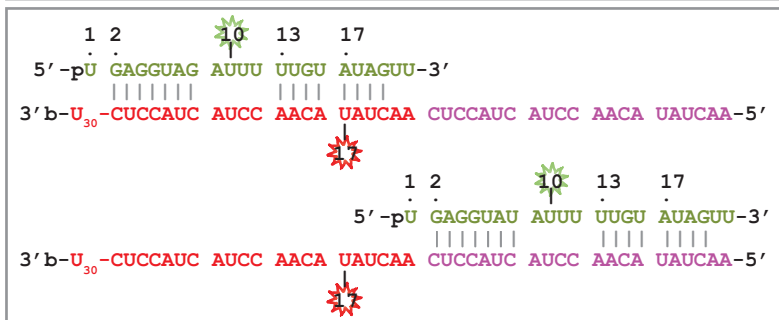

$N_1 = N_2 = 15$

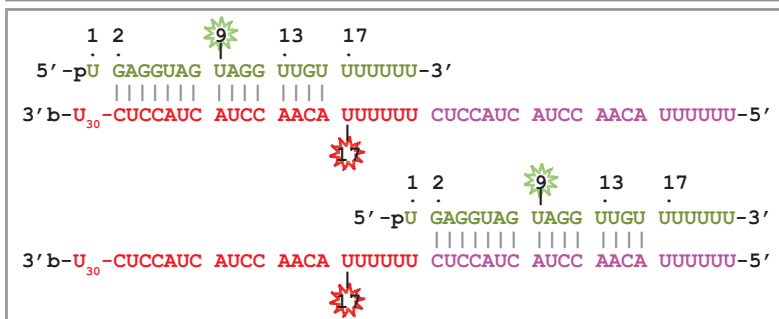

$N_1 = N_2 = 19$

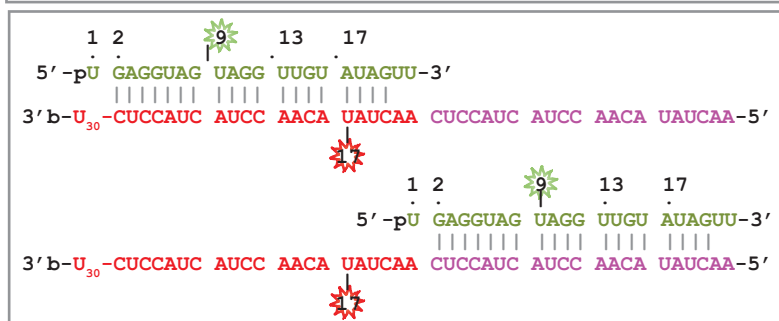**B**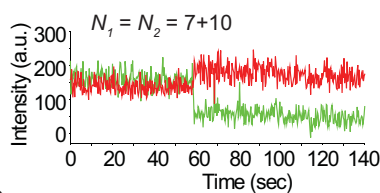**C**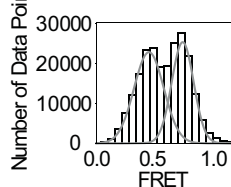**D**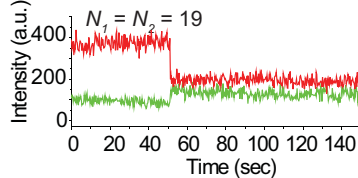**E**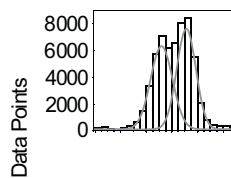**F**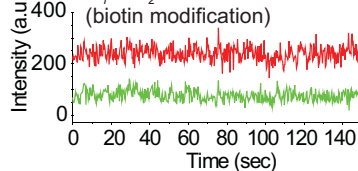**G**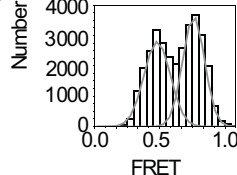

Supplement: NIHMS67271-supplement-Figure_S4.pdf [file NIHMS67271-supplement-Figure_S4.pdf]

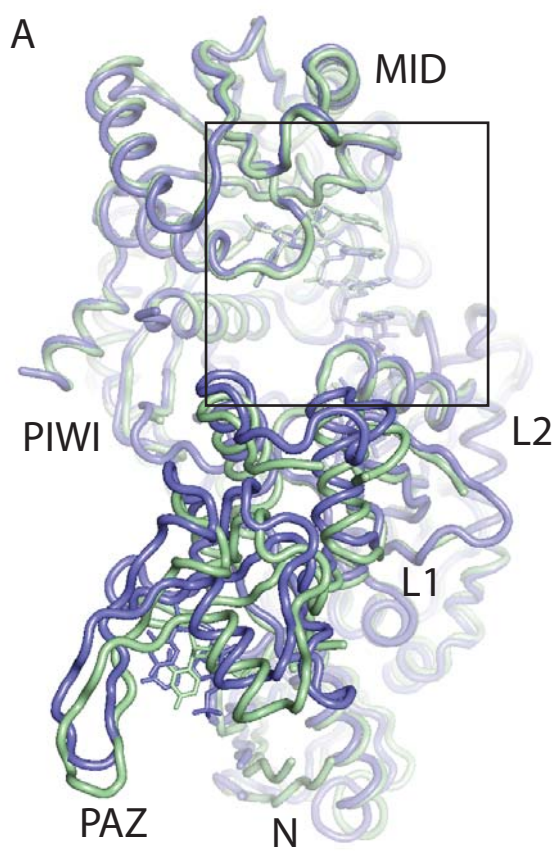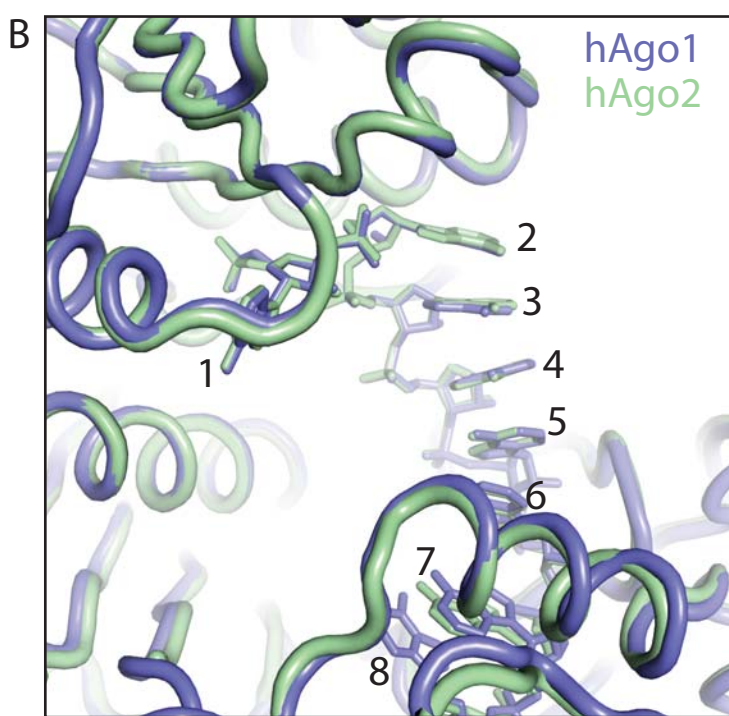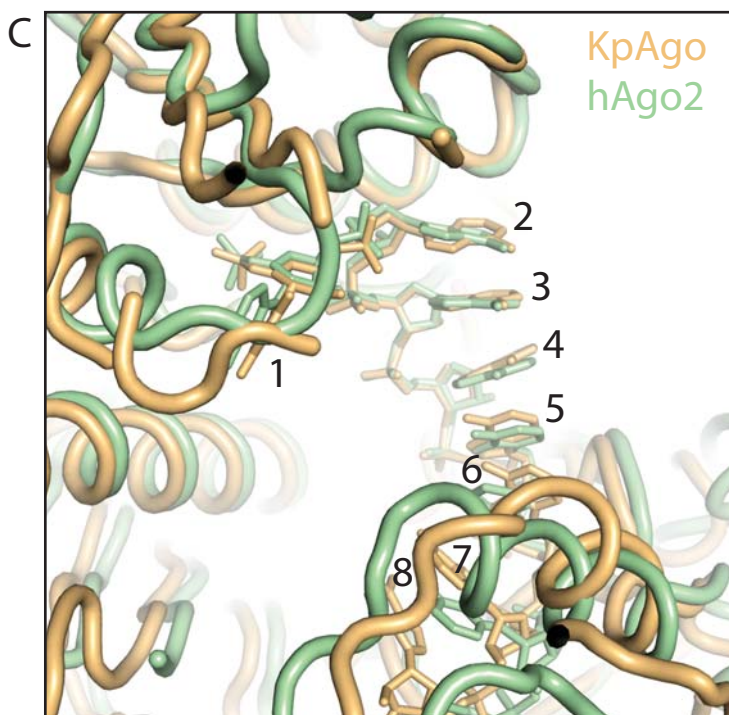

Supplement: NIHMS67271-supplement-Figure_S6.pdf [file NIHMS67271-supplement-Figure_S6.pdf]
